# Supplementary material for: Significance of PPARA as a Treatment Target for Chronic Lymphocytic Leukemia
Source: Hindawi journal article supplement (doi:10.1155/2023/8456833), 2023-06-26
Supplement: f2 [file 8456833.f2.pdf]

**Supplementary Table 1 The results from univariate analysis and multivariate analysis of prognostic factor of chronic lymphocytic leukemia.** The univariate analysis showed that 11 univariate variables with  $P < 0.05$  contributed to be poor prognostic factor. The factors with univariate analysis  $p < 0.1$  were included in the multivariate model for stepwise regression analysis. The variables in bold are statistically significant within the multivariable analysis.

| Factors                                               | univariate analysis |       |              | Multivariable analysis |              |                     |
|-------------------------------------------------------|---------------------|-------|--------------|------------------------|--------------|---------------------|
|                                                       | P value             | HR    | 95%CI        | P value                | HR           | 95%CI               |
| Female                                                | 0.826               | 1.088 | 0.512-2.313  |                        |              |                     |
| Age                                                   |                     |       |              |                        |              |                     |
| <45                                                   |                     | 1     |              |                        |              |                     |
| ≥45, <65                                              | 0.035               | 0.366 | 0.143-0.933  |                        |              |                     |
| ≥65                                                   | 0.082               | 0.389 | 0.135-1.126  |                        |              |                     |
| <b>CLL-IPI High risk</b>                              | <b>&lt;0.001</b>    | 6.758 | 3.134-14.573 | <b>0.025</b>           | 2.824        | 1.136-7.02          |
| del(13q)                                              | 0.113               | 1.977 | 0.851-4.591  |                        |              |                     |
| <b>del(11q)</b>                                       | <b>0.002</b>        | 3.388 | 1.546-7.424  | <b>0.002</b>           | 3.772        | 1.615-8.807         |
| del(17p)                                              | <0.001              | 5.474 | 2.060-14.545 |                        |              |                     |
| TP53 mutation                                         | 0.059               | 2.765 | 0.963-7.938  |                        |              |                     |
| IGHV Unmutated                                        | 0.044               | 2.082 | 1.018-4.255  |                        |              |                     |
| Initial WBC ( $\times 10^9/L$ )                       |                     |       |              |                        |              |                     |
| ≥100                                                  |                     | 1     |              |                        |              |                     |
| ≥50, <100                                             | 0.938               | 0.941 | 0.206-4.307  |                        |              |                     |
| <50                                                   | 0.114               | 0.308 | 0.071-1.329  |                        |              |                     |
| Initial HGB (g/L)                                     |                     |       |              |                        |              |                     |
| ≥110                                                  |                     | 1     |              |                        |              |                     |
| ≥90, <110                                             | 0.3                 | 1.679 | 0.63-4.474   |                        |              |                     |
| <90                                                   | <0.001              | 7.759 | 2.999-20.074 |                        |              |                     |
| <b>Initial PLT(&lt;100<math>\times 10^9/L</math>)</b> | <b>&lt;0.001</b>    | 6.373 | 2.764-14.691 | <b>0.003</b>           | <b>4.261</b> | <b>1.626-11.165</b> |
| Initial LYM (%)                                       |                     |       |              |                        |              |                     |
| ≥80                                                   |                     | 1     |              |                        |              |                     |
| ≥50, <80                                              | <b>0.022</b>        | 0.319 | 0.12-0.846   |                        |              |                     |
| <50                                                   | 0.79                | 1.142 | 0.430-3.032  |                        |              |                     |
| Initial LYM( $\times 10^9/L$ )                        |                     |       |              |                        |              |                     |
| >100                                                  |                     | 1     |              |                        |              |                     |
| ≥50, <100                                             | 0.754               | 1.292 | 0.260-6.418  |                        |              |                     |
| <50                                                   | 0.143               | 0.339 | 0.080-1.444  |                        |              |                     |
| Bulky disease                                         | 0.035               | 2.625 | 1.071-6.432  |                        |              |                     |
| Extranodal                                            | 0.807               | 1.196 | 0.285-5.021  |                        |              |                     |
| Hepatomegaly                                          | 0.996               | 0.997 | 0.237-4.184  |                        |              |                     |
| <b>Splenomegaly</b>                                   | <b>0.002</b>        | 3.651 | 1.629-8.181  | <b>0.009</b>           | <b>3.239</b> | <b>1.344-7.806</b>  |
| EGR2 mutation                                         | <0.001              | 5.5   | 2.2-14       |                        |              |                     |
| FBXW7 mutation                                        | 0.0014              | 4.4   | 1.8-11       |                        |              |                     |
