# Supplementary material for: Significance of PPARA as a Treatment Target for Chronic Lymphocytic Leukemia
Source: Hindawi journal article supplement (doi:10.1155/2023/8456833), 2023-06-26
Supplement: f3 [file 8456833.f3.pdf]

**Supplementary Table 2 Details of each connection between 83 genes and CLL and the 10 CLL TFS-related genes, including the relation type, relation direction, source node, and target node.**

negative Expression: ATM ---| TNF  
 positive Regulation: TNF --+> ATM  
 Regulation: ROR1 ---> FOXO1  
 ProtModification: ATM ---> FBXW7  
 positive Regulation: XIAP --+> chronic lymphocytic leukemia  
 positive MolTransport: NOTCH1 --+> IFNG  
 positive Regulation: CD40LG --+> chronic lymphocytic leukemia  
 positive Regulation: DLL4 --+> chronic lymphocytic leukemia  
 Expression: IL4 ---> EGR2  
 negative Regulation: GNA13 ---| MAPK1  
 Regulation: MIF ---> ATM  
 positive Expression: MAPK14 --+> EGR2  
 positive Regulation: EGR2 --+> IL4  
 Regulation: GNA12 ---> DAPK3  
 negative miRNAEffect: MIR223 ---| ATM  
 Regulation: MIR195 ---> FOXO1  
 positive Expression: EGR2 --+> PTHLH  
 positive DirectRegulation: MSI2 --+> KMT2A  
 negative Regulation: IRAK4 ---| KMT2A  
 negative Expression: NOTCH1 ---| PPARA  
 positive Expression: DLL4 --+> NOTCH1  
 positive DirectRegulation: DLL4 --+> NOTCH1  
 GeneticChange: chronic lymphocytic leukemia ---> EGR2  
 positive Expression: STAT3 --+> NOTCH1  
 positive Expression: FOXO1 --+> IL2  
 Expression: IL2 ---> FOXO1  
 positive Expression: NOTCH1 --+> DLL4  
 positive Regulation: EDNRA --+> GNA12  
 positive Regulation: PTHLH --+> chronic lymphocytic leukemia  
 Expression: NOTCH1 ---> FOXO1  
 DirectRegulation: NOTCH1 ---> FOXO1  
 positive MolTransport: KMT2A --+> GSK3B  
 positive Expression: TNFSF13B --+> NOTCH1  
 Regulation: FOXO1 ---> DLL4  
 negative Regulation: KMT2A ---| PPARA  
 Expression: PPARA ---> KMT2A  
 Regulation: NOTCH1 ---> CXCL13  
 negative miRNAEffect: MIR182 ---| FBXW7  
 Regulation: FBXW7 ---> PPARA  
 negative Regulation: FOXO1 ---| MAPK1  
 positive Regulation: CD44 --+> FOXO1  
 Regulation: ATM ---> MAPK1  
 Expression: PPARA ---> FOXO1  
 Expression: NOTCH1 ---> PPARA  
 Expression: NOTCH1 ---> XIAP  
 Regulation: NOTCH1 ---> GSK3B  
 Expression: FBXW7 ---> TNF  
 negative Regulation: NOTCH1 ---| ATM  
 negative Expression: VEGFA ---| ATM

Regulation: KMT2A ---> IL4  
Regulation: ATM ---> RPS15  
positive Regulation: IL2 --> chronic lymphocytic leukemia  
Expression: ATM ---> CYCS  
positive Regulation: NAMPT --> chronic lymphocytic leukemia  
GeneticChange: chronic lymphocytic leukemia ---> NOTCH1  
positive Expression: NOTCH1 --> TNFSF13B  
Biomarker: chronic lymphocytic leukemia ---> NOTCH1  
Regulation: THPO ---> ATM  
positive Regulation: IL4 --> FOXO1  
positive Expression: EGR2 --> TNFSF10  
CellExpression: chronic lymphocytic leukemia ---- NOTCH1  
Regulation: EGFR ---> FOXO1  
positive Regulation: NOTCH1 --> chronic lymphocytic leukemia  
positive Regulation: TNFSF14 --> chronic lymphocytic leukemia  
positive Regulation: MIR363 --> chronic lymphocytic leukemia  
positive Regulation: OGFOD1 --> chronic lymphocytic leukemia  
ProtModification: ATM ---> FOXO1  
PromoterBinding: KMT2A ---> TNF  
positive Regulation: MIR182 --> chronic lymphocytic leukemia  
Regulation: ICAM1 ---> FOXO1  
positive Expression: NOTCH1 --> VEGFA  
positive Expression: VEGFA --> NOTCH1  
positive PromoterBinding: FOXO1 --> ICAM1  
DirectRegulation: MSI2 ---> KMT2A  
positive Regulation: CSNK1D --> chronic lymphocytic leukemia  
positive Regulation: ZAP70 --> chronic lymphocytic leukemia  
positive Expression: KMT2A --> CD44  
negative Regulation: HIF1A ---| EGR2  
positive Regulation: CD27 --> chronic lymphocytic leukemia  
positive Regulation: TNFSF10 --> chronic lymphocytic leukemia  
positive Regulation: IL4 --> chronic lymphocytic leukemia  
positive Expression: FOXO1 --> CD40  
positive Expression: NOTCH1 --> IFNG  
MolTransport: NOTCH1 ---> IFNG  
Regulation: CD40 ---> FOXO1  
Regulation: IL24 ---> FOXO1  
QuantitativeChange: chronic lymphocytic leukemia ---> KMT2A  
positive Expression: PIK3CG --> NOTCH1  
Expression: NOTCH1 ---> PIK3CG  
CellExpression: KMT2A ---- chronic lymphocytic leukemia  
positive Regulation: FOXO1 --> WNT5A  
GeneticChange: chronic lymphocytic leukemia ---> KMT2A  
Regulation: GNA13 ---> MAPK1  
Expression: FOXO1 ---> BCL2L1  
negative Expression: NOTCH1 ---| BCL2L12  
negative PromoterBinding: FOXO1 ---| IFNG  
negative miRNAEffect: MIR223 ---| FBXW7  
negative MolTransport: KMT2A ---| MIF  
negative Expression: CD27 ---| FOXO1  
positive Regulation: MIF --> KMT2A  
positive Expression: KMT2A --> BCL2L1  
negative Expression: MAPK1 ---| FOXO1  
ProtModification: MAPK1 ---> FOXO1

negative Expression: FOXO1 ---| HIF1A  
positive Expression: CD40 --+> EGR2  
Expression: CXCR5 ---> FOXO1  
negative Expression: KMT2A ---| MIF  
positive PromoterBinding: HIF1A --+> FOXO1  
Expression: EGR2 ---> IFNG  
positive Expression: IFNG --+> EGR2  
negative MolTransport: EGR2 ---| IFNG  
Regulation: ATM ---> STAT3  
Expression: FBXW7 ---> VEGFA  
negative Expression: FBXW7 ---| HIF1A  
Regulation: KMT2A ---> chronic lymphocytic leukemia  
positive Regulation: HAVCR2 --+> chronic lymphocytic leukemia  
Regulation: FOXO1 ---> MAPK1  
positive Regulation: ZFYVE19 --+> chronic lymphocytic leukemia  
positive Regulation: NEDD9 --+> chronic lymphocytic leukemia  
positive Expression: CXCL12 --+> FOXO1  
Regulation: IFNG ---> FOXO1  
positive Expression: NOTCH1 --+> ICAM1  
positive Regulation: ICAM1 --+> NOTCH1  
positive Regulation: VEGFA --+> chronic lymphocytic leukemia  
positive Regulation: EDNRA --+> chronic lymphocytic leukemia  
positive Regulation: SYK --+> chronic lymphocytic leukemia  
positive Expression: NOTCH1 --+> PDCD1  
positive Regulation: HDAC6 --+> chronic lymphocytic leukemia  
negative Expression: NOTCH1 ---| TCF3  
positive Regulation: CXCL12 --+> chronic lymphocytic leukemia  
positive Regulation: ZNF215 --+> chronic lymphocytic leukemia  
positive PromoterBinding: TCF3 --+> NOTCH1  
Regulation: PTHLH ---> FOXO1  
Regulation: NOTCH1 ---> MAPK14  
Regulation: KMT2A ---> MAPK1  
PromoterBinding: RELA ---> EGR2  
Regulation: EDN1 ---> NOTCH1  
positive PromoterBinding: FOXO1 --+> CXCR4  
positive Regulation: PIK3CG --+> chronic lymphocytic leukemia  
Regulation: CXCR4 ---> FOXO1  
negative Expression: GNA13 ---| DLL4  
Regulation: EDN1 ---> GNA13  
positive Regulation: PTHLH --+> NOTCH1  
positive Expression: GNA13 --+> EDN1  
negative miRNAEffect: MIR195 ---| FBXW7  
positive Regulation: MIF --+> chronic lymphocytic leukemia  
Regulation: MIR130A ---> ATM  
Regulation: PTHLH ---> NOTCH1  
positive Regulation: EGFR --+> GNA13  
positive Expression: GNA12 --+> IL2  
Binding: GNA13 ---- CXCR5  
positive Regulation: NAMPT --+> ATM  
Expression: IL4 ---> FOXO1  
positive Expression: CXCL12 --+> NOTCH1  
Regulation: IL21 ---> FOXO1  
Regulation: NOTCH1 ---> CXCL12  
Expression: TNFSF11 ---> FOXO1

PromoterBinding: FOXO1 ---> TNFSF11  
Expression: IL4 ---> ATM  
negative Expression: ATM ---| IL4  
positive Expression: ATM --+> GSK3B  
positive Expression: TNF --+> FOXO1  
positive PromoterBinding: FOXO1 --+> TNF  
positive Regulation: EGR2 --+> CXCR5  
positive Regulation: ATM --+> XIAP  
Regulation: TNFSF10 ---> ATM  
negative Regulation: ATM ---| TNFSF10  
positive Expression: NOTCH1 --+> WNT5A  
Binding: NOTCH1 ---- DLL4  
Regulation: IFNG ---> NOTCH1  
positive Expression: EGR2 --+> TNF  
positive Expression: TNF --+> EGR2  
Expression: FOXO1 ---> CXCR4  
negative Expression: FBXW7 ---| BCL2L1  
negative miRNAEffect: MIR15A ---| FOXO1  
negative Regulation: NOTCH1 ---| KCNA3  
positive Regulation: KCNA3 --+> NOTCH1  
positive Regulation: MIR223 --+> NOTCH1  
positive PromoterBinding: KMT2A --+> TNF  
positive MolTransport: KMT2A --+> TNF  
Expression: NOTCH1 ---> MIR223  
positive Regulation: TNF --+> KMT2A  
positive DirectRegulation: CXCR4 --+> GNA13  
PromoterBinding: FOXO1 ---> EDN1  
ProtModification: ATM ---> CSNK1D  
Expression: ATM ---> IFNG  
positive Regulation: IFNG --+> ATM  
positive Regulation: KDM6A --+> FBXW7  
Expression: FOXO1 ---> NAMPT  
Regulation: EDN1 ---> FOXO1  
positive Expression: MAPK14 --+> NOTCH1  
negative Expression: KMT2A ---| CXCL12  
positive Regulation: NOTCH1 --+> MAPK14  
Expression: NOTCH1 ---> STAT6  
Regulation: EGR2 ---> MAPK1  
positive Expression: IL4 --+> NOTCH1  
positive Expression: NOTCH1 --+> BCL2L1  
negative Regulation: NOTCH1 ---| EDNRA  
positive MolTransport: IL24 --+> ATM  
Expression: GSK3B ---> FOXO1  
ProtModification: FBXW7 ---> PDCD1  
positive Regulation: MSI2 --+> NOTCH1  
Regulation: TNFSF13B ---> FOXO1  
positive Expression: MAPK1 --+> EGR2  
positive Expression: FOXO1 --+> TNFSF13B  
Expression: KDM6A ---> CD44  
Expression: EGR2 ---> VEGFA  
Expression: KDM6A ---> ICAM1  
positive Expression: IL4 --+> EGR2  
negative Regulation: IL7 ---| FOXO1  
positive Expression: KMT2A --+> HIF1A

DirectRegulation: EGFR ---> ATM  
positive Regulation: CX3CL1 --+> chronic lymphocytic leukemia  
negative Expression: ATM ---| IL2  
positive Regulation: TNFSF13B --+> chronic lymphocytic leukemia  
Expression: NOTCH1 ---> TNFSF10  
positive Regulation: CXCR4 --+> chronic lymphocytic leukemia  
Regulation: TNFSF10 ---> NOTCH1  
positive Expression: MAPK1 --+> NOTCH1  
Expression: NAMPT ---> NOTCH1  
Expression: MIF ---> FBXW7  
positive Regulation: NOTCH1 --+> IL7  
positive Regulation: EDN1 --+> ATM  
positive Regulation: PDCD1 --+> chronic lymphocytic leukemia  
Expression: GNA12 ---> IFNG  
negative miRNAEffect: MIR363 ---| FBXW7  
DirectRegulation: WNT5A ---> NOTCH1  
positive Regulation: CXCR4 --+> GNA12  
negative Expression: STAT6 ---| NOTCH1  
Regulation: KMT2A ---> NOTCH1  
ProtModification: GSK3B ---> FBXW7  
negative Regulation: VEGFA ---| ATM  
negative Expression: GSK3B ---| FBXW7  
negative Expression: ATM ---| VEGFA  
positive Regulation: PTX3 --+> chronic lymphocytic leukemia  
Expression: NOTCH1 ---> ITGA4  
positive Regulation: r\_Mir16 --+> chronic lymphocytic leukemia  
Regulation: KMT2A ---> RELA  
Regulation: GNA12 ---> MAPK14  
Regulation: ATM ---> EGFR  
Regulation: NOTCH1 ---> MAPK1  
ProtModification: MAPK1 ---> FBXW7  
positive Expression: FOXO1 --+> NAMPT  
Expression: MAPK1 ---> FBXW7  
PromoterBinding: FOXO1 ---> NAMPT  
positive Regulation: ROR1 --+> chronic lymphocytic leukemia  
positive Expression: NOTCH1 --+> XIAP  
DirectRegulation: NOTCH1 ---> XIAP  
Regulation: NAMPT ---> FOXO1  
Regulation: FBXW7 ---> MAPK1  
positive Expression: IL7 --+> NOTCH1  
negative Expression: GNA12 ---| TNFSF11  
Expression: ATM ---> CD44  
Expression: KDM6A ---> TNF  
Regulation: FBXW7 ---> EGFR  
Regulation: TNF ---> KDM6A  
Regulation: GNA13 ---> RELA  
positive Regulation: WNT16 --+> chronic lymphocytic leukemia  
PromoterBinding: FOXO1 ---> VEGFA  
negative ProtModification: GSK3B ---| FOXO1  
Regulation: VEGFA ---> FOXO1  
Expression: FOXO1 ---> STAT3  
ProtModification: FBXW7 ---> NOTCH1  
Binding: NOTCH1 ---- XIAP  
Regulation: IL2 ---> EGR2

negative miRNAEffect: MIR182 ---| FOXO1  
Expression: EGR2 ---> IL2  
positive Regulation: GSTP1 --+> chronic lymphocytic leukemia  
positive Regulation: TNFSF11 --+> GNA13  
Regulation: ATM ---> MIR182  
positive Regulation: MIR130A --+> chronic lymphocytic leukemia  
negative miRNAEffect: MIR182 ---| ATM  
Regulation: GSK3B ---> KMT2A  
Expression: IL2 ---> NOTCH1  
positive Expression: NOTCH1 --+> RELA  
Regulation: KMT2A ---> GSK3B  
positive MolTransport: NOTCH1 --+> RELA  
ProtModification: RELA ---> NOTCH1  
Regulation: TNFSF11 ---> NOTCH1  
positive Regulation: IRAK4 --+> chronic lymphocytic leukemia  
PromoterBinding: RELA ---> NOTCH1  
Expression: FOXO1 ---> IL2  
Regulation: FOXO1 ---> RELA  
Regulation: EGR2 ---> GSK3B  
Expression: TNFSF11 ---> EGR2  
Regulation: ATM ---> FOXO1  
positive Expression: NOTCH1 --+> IL4  
positive PromoterBinding: STAT3 --+> NOTCH1  
positive Regulation: WNT3 --+> chronic lymphocytic leukemia  
positive Regulation: IL4 --+> NOTCH1  
positive Regulation: HIF1A --+> chronic lymphocytic leukemia  
positive Regulation: CXCL13 --+> chronic lymphocytic leukemia  
Regulation: GNA12 ---> EGFR  
positive Expression: GNA12 --+> VEGFA  
positive Expression: NAMPT --+> NOTCH1  
Expression: CD40LG ---> ATM  
negative Expression: GSK3B ---| EGR2  
positive Regulation: IL21 --+> chronic lymphocytic leukemia  
negative Expression: FOXO1 ---| TNFSF11  
Expression: MAPK1 ---> EGR2  
Expression: PTPN22 ---> ATM  
positive DirectRegulation: TCF3 --+> FOXO1  
positive PromoterBinding: TCF3 --+> FOXO1  
Regulation: WNT3 ---> NOTCH1  
positive Regulation: EGFR --+> chronic lymphocytic leukemia  
Regulation: GNA13 ---> GSK3B  
Regulation: EGR2 ---> CD44  
positive Regulation: STAT6 --+> chronic lymphocytic leukemia  
negative Regulation: PIK3CD ---| FOXO1  
positive Regulation: BCL2L1 --+> chronic lymphocytic leukemia  
positive Regulation: GNA12 --+> GSK3B  
positive Regulation: NOTCH1 --+> CXCL12  
positive Regulation: CYCS --+> chronic lymphocytic leukemia  
positive Regulation: THPO --+> EGR2  
positive Regulation: PIK3CD --+> chronic lymphocytic leukemia  
positive Regulation: RELA --+> chronic lymphocytic leukemia  
Expression: NOTCH1 ---> TNF  
positive Regulation: GNA12 --+> STAT3  
positive Regulation: KCNA3 --+> chronic lymphocytic leukemia

positive Regulation: CD70 --> chronic lymphocytic leukemia  
Expression: CD40LG ---> KMT2A  
Expression: IL4 ---> NOTCH1  
negative Expression: NOTCH1 ---| ZAP70  
positive Expression: GNA13 --> VEGFA  
positive PromoterBinding: STAT3 --> FOXO1  
negative Regulation: FBXW7 ---| DLL4  
positive Expression: FOXO1 --> CYCS  
Regulation: IL4 ---> KDM6A  
Binding: HDAC6 ---- FOXO1  
positive Regulation: EGFR --> FOXO1  
positive Regulation: NOTCH1 --> CXCL13  
PromoterBinding: HIF1A ---> FOXO1  
ProtModification: ATM ---> TCF3  
Regulation: CD40 ---> ATM  
positive Expression: KDM6A --> HAVCR2  
positive Expression: NOTCH1 --> IL2  
positive Regulation: WNT16 --> GNA12  
negative Expression: EGFR ---| NOTCH1  
positive Regulation: CD44 --> chronic lymphocytic leukemia  
positive Expression: NOTCH1 --> EGFR  
Expression: NOTCH1 ---> WNT3  
positive Regulation: GSTM1 --> chronic lymphocytic leukemia  
QuantitativeChange: chronic lymphocytic leukemia ---> FBXW7  
GeneticChange: chronic lymphocytic leukemia ---> FBXW7  
positive Regulation: FBXW7 --> CD40LG  
negative miRNAEffect: MIR363 ---| NOTCH1  
negative miRNAEffect: MIR182 ---| GNA13  
PromoterBinding: FOXO1 ---> PPARA  
positive Expression: KDM6A --> TNFSF10  
positive Regulation: STAT6 --> EGR2  
positive Regulation: NME2 --> chronic lymphocytic leukemia  
Regulation: FBXW7 ---> STAT3  
positive Expression: KDM6A --> PDCD1  
positive Expression: NOTCH1 --> CD44  
MolTransport: PIK3CG ---> FOXO1  
positive Expression: KDM6A --> WNT3  
positive Regulation: MAPK1 --> chronic lymphocytic leukemia  
positive Regulation: ATM --> BCL2L1  
Expression: NOTCH1 ---> IFNG  
positive Expression: KDM6A --> IFNG  
positive Expression: NOTCH1 --> MAPK1  
Expression: NOTCH1 ---> CXCL12  
positive PromoterBinding: FOXO1 --> PDCD1  
Expression: NOTCH1 ---> CXCR4  
positive Expression: NOTCH1 --> HIF1A  
positive PromoterBinding: HIF1A --> NOTCH1  
positive Expression: FOXO1 --> IL4  
PromoterBinding: KMT2A ---> WNT5A  
negative Regulation: NOTCH1 ---| GSK3B  
positive Expression: GNA12 --> HIF1A  
Expression: GSK3B ---> NOTCH1  
ProtModification: GSK3B ---> NOTCH1  
negative Regulation: FOXO1 ---| STAT6

positive Regulation: CXCL12 --> GNA13  
positive Regulation: PPARA --> chronic lymphocytic leukemia  
Regulation: VEGFA ---> EGR2  
negative DirectRegulation: NOTCH1 ---| ATM  
positive Regulation: GNA13 --> EGFR  
ProtModification: ATM ---> HIF1A  
positive Regulation: MAPK1 --> ATM  
positive Regulation: ATM --> MAPK1  
positive Regulation: WNT5A --> chronic lymphocytic leukemia  
positive Regulation: ITGA4 --> chronic lymphocytic leukemia  
Expression: FBXW7 ---> EGFR  
PromoterBinding: STAT3 ---> NOTCH1  
positive Regulation: NOTCH1 --> STAT3  
positive Regulation: EDN1 --> chronic lymphocytic leukemia  
positive Regulation: GNA13 --> MAPK14  
positive Regulation: GNA12 --> MAPK14  
Expression: CD44 ---> FOXO1  
ProtModification: KDM6A ---> NOTCH1  
PromoterBinding: STAT3 ---> FOXO1  
ProtModification: MAPK14 ---> FOXO1  
negative Expression: CD40 ---| KMT2A  
positive Expression: MAPK14 --> FOXO1  
positive Regulation: SEMA4D --> chronic lymphocytic leukemia  
ProtModification: FOXO1 ---> GSK3B  
Expression: TNF ---> NOTCH1  
Expression: ATM ---> RELA  
DirectRegulation: TNF ---> NOTCH1  
ProtModification: GSK3B ---> FOXO1  
Expression: FOXO1 ---> SYK  
positive Expression: TCF3 --> FOXO1  
negative Expression: FBXW7 ---| RELA  
PromoterBinding: RELA ---> FBXW7  
positive Expression: NOTCH1 --> STAT3  
positive Regulation: STAT3 --> EGR2  
Regulation: EGR2 ---> STAT3  
Regulation: EGR2 ---> NOTCH1  
negative Expression: NOTCH1 ---| EGR2  
negative Expression: ATM ---| IFNG  
positive Regulation: CD40 --> chronic lymphocytic leukemia  
Regulation: ATM ---> RELA  
positive Expression: NOTCH1 --> TNF  
positive MolTransport: KDM6A --> RELA  
positive Regulation: TNF --> chronic lymphocytic leukemia  
Expression: NOTCH1 ---> MAPK1  
GeneticChange: chronic lymphocytic leukemia ---> RPS15  
ProtModification: HDAC6 ---> FOXO1  
positive Regulation: TNFSF11 --> chronic lymphocytic leukemia  
positive Regulation: MIR223 --> chronic lymphocytic leukemia  
Regulation: ATM ---> GSK3B  
Regulation: CSNK1D ---> FOXO1  
Regulation: HDAC6 ---> EGR2  
positive Regulation: KMT2A --> MAPK1  
negative miRNAEffect: MIR223 ---| FOXO1  
Regulation: SYK ---> FOXO1



positive Regulation: DAPK3 --> chronic lymphocytic leukemia  
negative miRNAEffect: MIR223 ---| KMT2A  
positive Expression: EGFR --> EGR2  
Expression: KMT2A ---> VEGFA  
Expression: EGFR ---> KDM6A  
positive MolTransport: NOTCH1 --> CXCL12  
Regulation: GNA12 ---> MAPK1  
positive Expression: NOTCH1 --> PPARA  
positive Regulation: MIR663B --> chronic lymphocytic leukemia  
Regulation: SDF-1alpha ---> FOXO1  
Expression: FOXO1 ---> SDF-1alpha  
negative Regulation: WNT5A ---| EGR2  
positive Regulation: ATM --> CXCR4  
negative Expression: EGR2 ---| IL21  
Regulation: KMT2A ---> MAPK14  
Regulation: CD40LG ---> FOXO1  
Expression: MAPK14 ---> EGR2  
Regulation: ATM ---> KMT2A  
positive Regulation: MSI2 --> chronic lymphocytic leukemia  
positive Regulation: ATM --> MAPK14  
positive Regulation: CD40LG --> ATM  
negative Expression: ATM ---| CD27  
ProtModification: MAPK1 ---> RPS15  
positive Regulation: GNA13 --> STAT3  
negative Regulation: KMT2A ---| MAPK14  
positive Regulation: MAPK14 --> KMT2A  
positive Expression: KDM6A --> CXCR4  
positive PromoterBinding: STAT3 --> KDM6A  
negative Expression: GNA12 ---| DLL4  
negative Expression: GNA12 ---| IL4  
positive Expression: KMT2A --> CXCR4  
positive Regulation: BCL2L12 --> chronic lymphocytic leukemia  
positive Regulation: IL7 --> chronic lymphocytic leukemia  
positive Regulation: CD47 --> chronic lymphocytic leukemia  
negative Regulation: IFNG ---| NOTCH1  
negative Expression: FOXO1 ---| IFNG  
positive Regulation: STAT3 --> chronic lymphocytic leukemia  
negative Regulation: PPARA ---| FOXO1  
positive Regulation: EGR2 --> TNFSF11  
positive Regulation: BCL2A1 --> chronic lymphocytic leukemia  
positive MolTransport: NOTCH1 --> VEGFA  
negative Expression: FOXO1 ---| VEGFA  
positive Expression: IL2 --> FOXO1  
positive Regulation: IFNG --> chronic lymphocytic leukemia  
positive Expression: EGR2 --> PDCD1  
Expression: IL24 ---> NOTCH1  
negative miRNAEffect: MIR182 ---| EGR2  
positive Regulation: SDF-1alpha --> chronic lymphocytic leukemia  
positive Expression: FOXO1 --> RELA  
Expression: KMT2A ---> TNFSF11  
positive Regulation: NOTCH1 --> THPO  
ProtModification: MAPK14 ---> FBXW7  
Binding: NOTCH1 ---- FOXO1  
negative Expression: MAPK14 ---| FBXW7

positive Regulation: TCF3 --> chronic lymphocytic leukemia  
negative Regulation: ATM ---| HDAC6  
PromoterBinding: KMT2A ---> IFNG  
positive Regulation: CXCR5 --> chronic lymphocytic leukemia  
positive Regulation: FOXO1 --> NOTCH1  
Expression: HDAC6 ---> NOTCH1  
positive Regulation: IL24 --> chronic lymphocytic leukemia  
positive Regulation: MAPK14 --> chronic lymphocytic leukemia  
positive Regulation: MIR195 --> chronic lymphocytic leukemia  
positive Regulation: GSK3B --> chronic lymphocytic leukemia  
negative Expression: FBXW7 ---| NOTCH1  
positive Regulation: MIR15A --> chronic lymphocytic leukemia  
Expression: MAPK1 ---> KMT2A  
negative ProtModification: FBXW7 ---| NOTCH1  
positive Regulation: ICAM1 --> chronic lymphocytic leukemia  
Expression: FOXO1 ---> VEGFA  
Regulation: PPARA ---> chronic lymphocytic leukemia  
positive Expression: FOXO1 --> TNF  
Expression: NOTCH1 ---> TNFSF11  
positive Regulation: WNT5A --> FOXO1  
Expression: FOXO1 ---> WNT5A  
Expression: NOTCH1 ---> STAT3  
positive Expression: TNFSF11 --> NOTCH1  
Binding: KDM6A ---- KMT2A  
positive Regulation: WNT16 --> GNA13  
positive Regulation: PTPN22 --> chronic lymphocytic leukemia  
positive Regulation: ATM --> BCL2A1  
positive Regulation: GNA13 --> WNT16  
ProtModification: CYCS ---> NOTCH1  
positive Expression: NOTCH1 --> CYCS  
positive Regulation: EDN1 --> GNA12  
negative QuantitativeChange: chronic lymphocytic leukemia ---| ATM  
Regulation: ATM ---> chronic lymphocytic leukemia  
GeneticChange: chronic lymphocytic leukemia ---> ATM  
Biomarker: chronic lymphocytic leukemia ---> ATM  
positive Regulation: THPO --> chronic lymphocytic leukemia  
positive Expression: NOTCH1 --> CXCR4  
positive Regulation: GSTP1 --> ATM  
positive DirectRegulation: NOTCH1 --> XIAP  
positive PromoterBinding: FOXO1 --> TNFSF10
